# Supplementary material
Source: MDPI journal article supplement (https://www.mdpi.com/2813-3137/1/1/6)
Supplement: s1 [file s1]

Archive with 1 entries (1 files):
- targets-2502198-supplementary.pdf
